# Supplementary material for: Loss of methylation of H19-imprinted gene derived from assisted reproductive technologies can be mitigated by cleavage-stage embryo transfer in mice
Source: Springer Nature journal article supplement (doi:10.1007/s10815-019-01575-x), 2019-09-12
Supplement: MOESM1 [file 17165950]

**Supplemental Table 1**

Primer Sequences for the BSP

| Gene | | Primer Sequences | GenBank accession No. |
| --- | --- | --- | --- |
| *H19* | 1st round | forward 5'-GAGTATTTAGGAGGTATAAGAATT-3' | U19619  (1278-1751) |
| reverse 5'-ATCAAAAACTAACATAAACCCCT-3' |
| 2nd round | forward 5'-GTAAGGAGATTATGTTTATTTTTGG-3' | U19619  (1304-1726) |
| reverse 5'-CCTCATAAAACCCATAACTAT-3' |
| *Snrpn* | 1st round | forward 5'-TATGTAATATGATATAGTTTAGAAATTAG-3' | AF081460  (2073-2601) |
| reverse 5'-AATAAACCCAAATCTAAAATATTTTAATC-3' |
| 2nd round | forward 5'-AATTTGTGTGATGTTTGTAATTATTTGG-3' | AF081460  (2151-2570) |
| reverse 5'-ATAAAATACACTTTCACTACTAAAATCC-3' |
